# Supplementary material for: Human Umbilical Vein Endothelial Cells Form a Network on a Hyaluronic Acid/Gelatin Composite Hydrogel Moderately Crosslinked and Degraded by Hydrogen Peroxide
Source: MDPI journal article supplement (doi:10.3390/polym14225034), 2022-11-20
Supplement: s1 [file s1]

Supplementary Information

# Human Umbilical Vein Endothelial Cells Form a Network on a Hyaluronic Acid/Gelatin Composite Hydrogel Moderately Crosslinked and Degraded by Hydrogen Peroxide

Kelum Chamara Manoj Lakmal Elvitigala, Wildan Mubarak, and Shinji Sakai\*

Department of Materials Engineering Science, Graduate School of Engineering Science, Osaka University, Toyonaka 560-8531, Japan

\* Correspondence: sakai@cheng.es.osaka-u.ac.jp

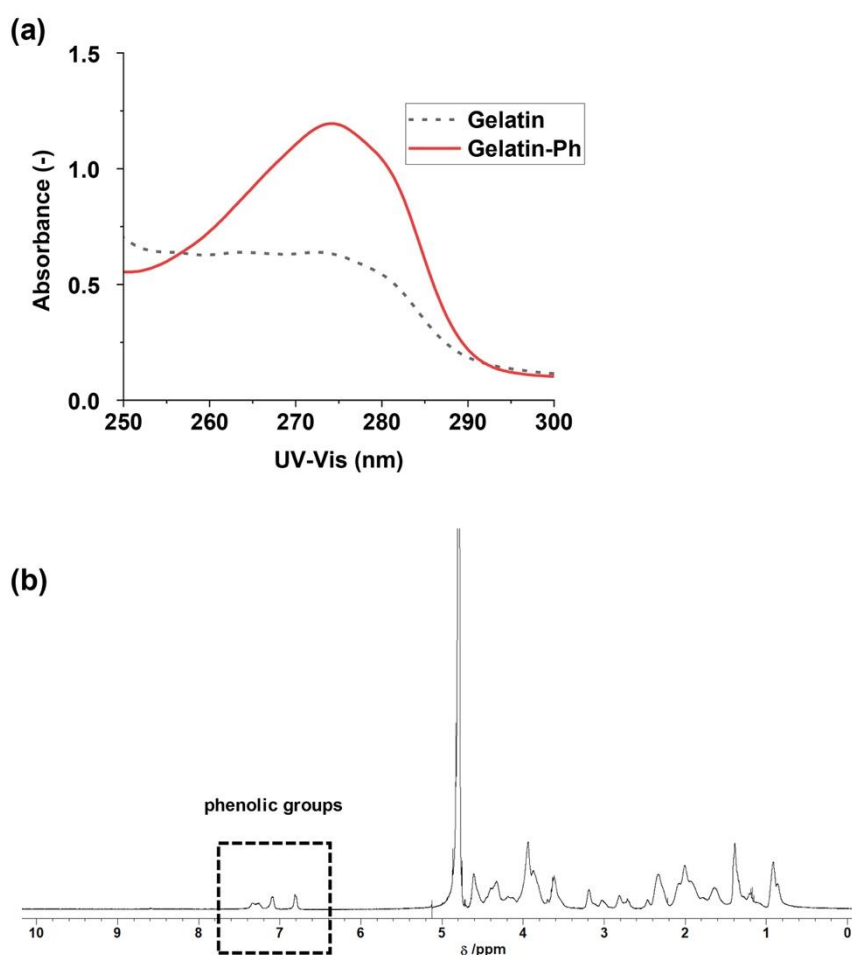

**Figure S1.** UV-Vis and <sup>1</sup>H NMR spectroscopy of Gelatin-Ph. (a) UV-Vis absorbance of unmodified gelatin and Gelatin-Ph. The absorbance peak at 275 nm indicated the presence of phenol groups in the Gelatin-Ph. (b) <sup>1</sup>H NMR spectroscopy of Gelatin-Ph (400 MHz, 25 °C, 64 scans) showing the presence of phenolic groups at 6.5 to 7.5 ppm.

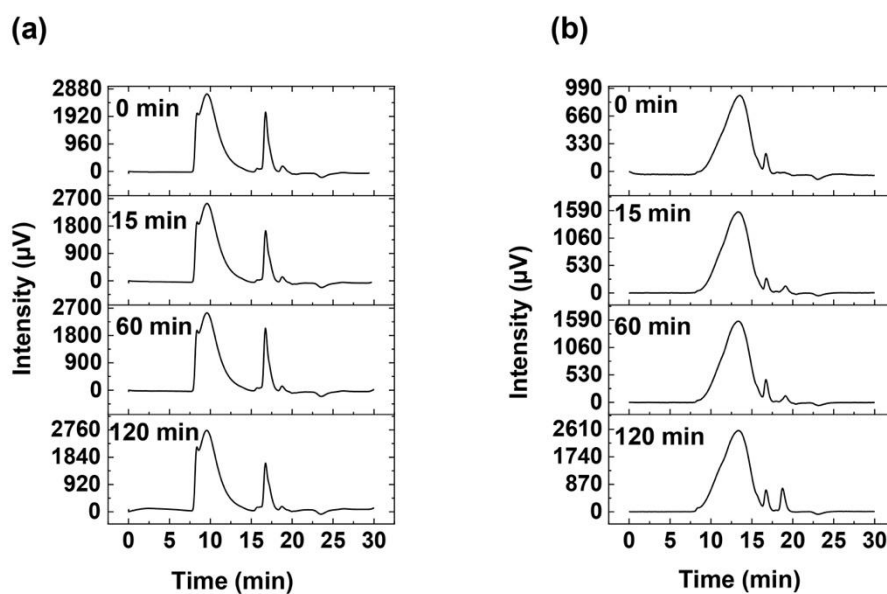

**Figure S2.** Intensity-time curve of (a) Gelatin-Ph and (b) HA-Ph after exposure to air containing 16 ppm H<sub>2</sub>O<sub>2</sub> for 0 – 120 min. Peak top molecular weight relative to the polyethylene glycol (standard). LC conditions: separation was conducted on a SHIMADZU HPLC system equipped with Shodex OHpak SB804 HQ, 8 mmID x 300 mmL column; mobile phase PBS at pH 7.4; flowrate, 0.7 mL/min; temperature, 25 °C.
